# Supplementary material
Source: PubMed Central journal article supplement (PMC6754861)
Supplement: NIHMS1030567-supplement-Supplemental_Appendix.pdf [file NIHMS1030567-supplement-Supplemental_Appendix.pdf]

## Supplementary Appendix

This appendix has been provided by the authors to give readers additional information about their work.

Supplement to: Lauby-Secretan B, Scoccianti C, Loomis D, et al. Body fatness and cancer — viewpoint of the IARC working group. *N Engl J Med* 2016;375:794-8. DOI: [10.1056/NEJMSr1606602](https://doi.org/10.1056/NEJMSr1606602)

International Agency for Research on Cancer Handbook Vol.16 Working Group members:

Annie S. Anderson, University of Dundee, UK [Subgroup Chair]

Jennifer L. Baker, Institute of Preventive Medicine, Denmark

João Breda, World Health Organization (WHO) Regional Office for Europe, Denmark

Tim Byers, Colorado School of Public Health, USA

Margot P. Cleary, University of Minnesota, USA

Graham Colditz, Washington University in St Louis, USA [Overall Chair]

Mariachiara Di Cesare, Middlesex University, United Kingdom

Susan M. Gapstur, American Cancer Society, USA

Marc Gunter, International Agency for Research on Cancer, France

Ronald A. Herbert, National Institute of Environmental Health Sciences, USA [Subgroup Chair]

Stephen D. Hursting, University of North Carolina at Chapel Hill, USA

Rudolf Kaaks, German Cancer Research Center (DKFZ), Germany [Subgroup Chair]

Michael Leitzmann, University Hospital Regensburg, Germany

Jennifer Ligibel, Dana Farber Cancer Institute, USA

Andrew Renehan, University of Manchester, UK

Isabelle Romieu, Instituto Nacional de Salud Pública, Mexico

Isao Shimokawa, Nagasaki University, Japan

Henry J. Thompson, Colorado State University, USA [Subgroup Chair]

Cornelia M. Ulrich, Huntsman Cancer Institute, USA

Kaitlin Wade, University of Bristol, UK

Elisabete Weiderpass, Cancer Registry of Norway, Norway
